# Supplementary material for: Unveiling novel cell clusters and biomarkers in glioblastoma and its peritumoral microenvironment at the single-cell perspective
Source: PubMed Central journal article supplement (PMC11162569; doi:10.1186/s12967-024-05313-5), 2024-06-08

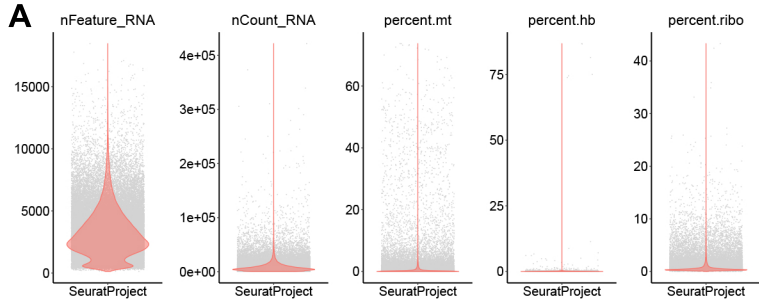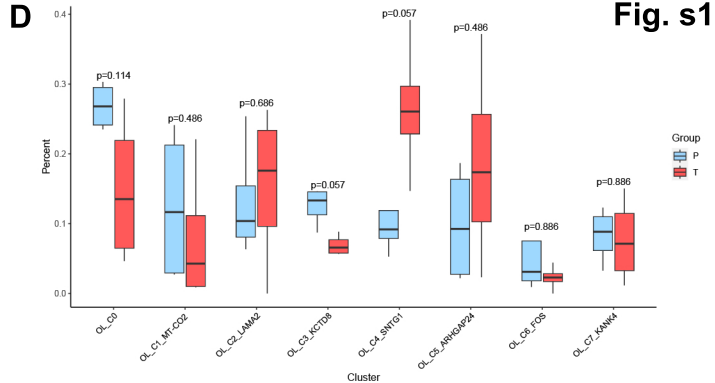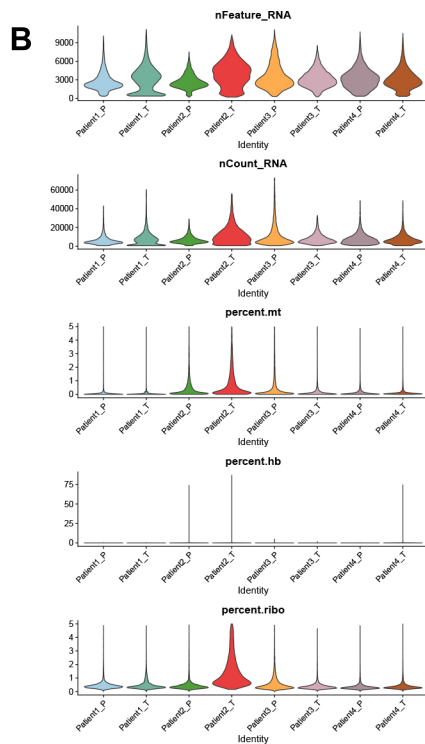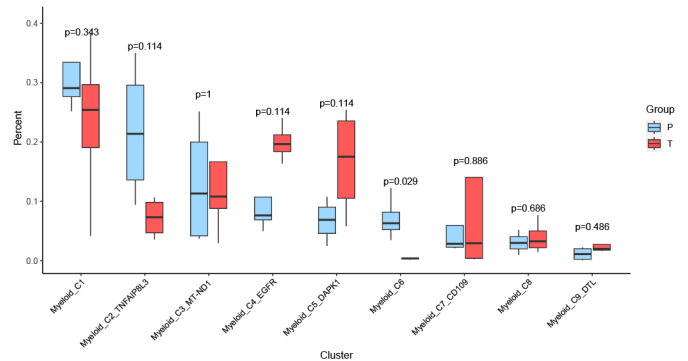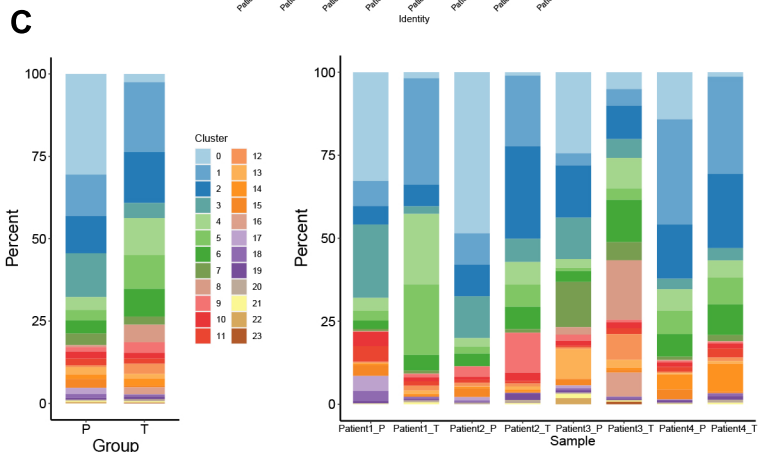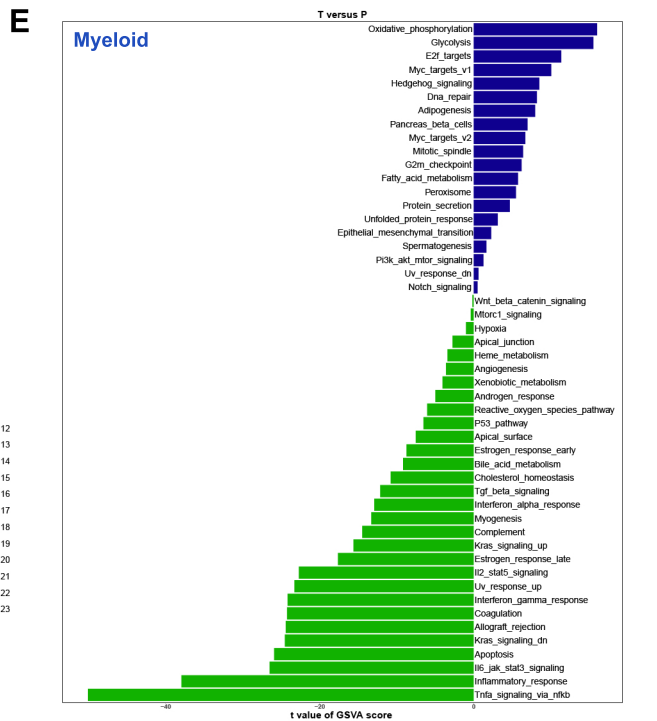

Supplement: 12967_2024_5313_MOESM1_ESM.pdf [file 12967_2024_5313_MOESM1_ESM.pdf]
